# Supplementary material
Source: publisher figshare collection journal article supplement (https://tandf.figshare.com/ndownloader/files/17480753)
Supplement: Supplementary file 1 [file 17480753]

Supplementary material 1


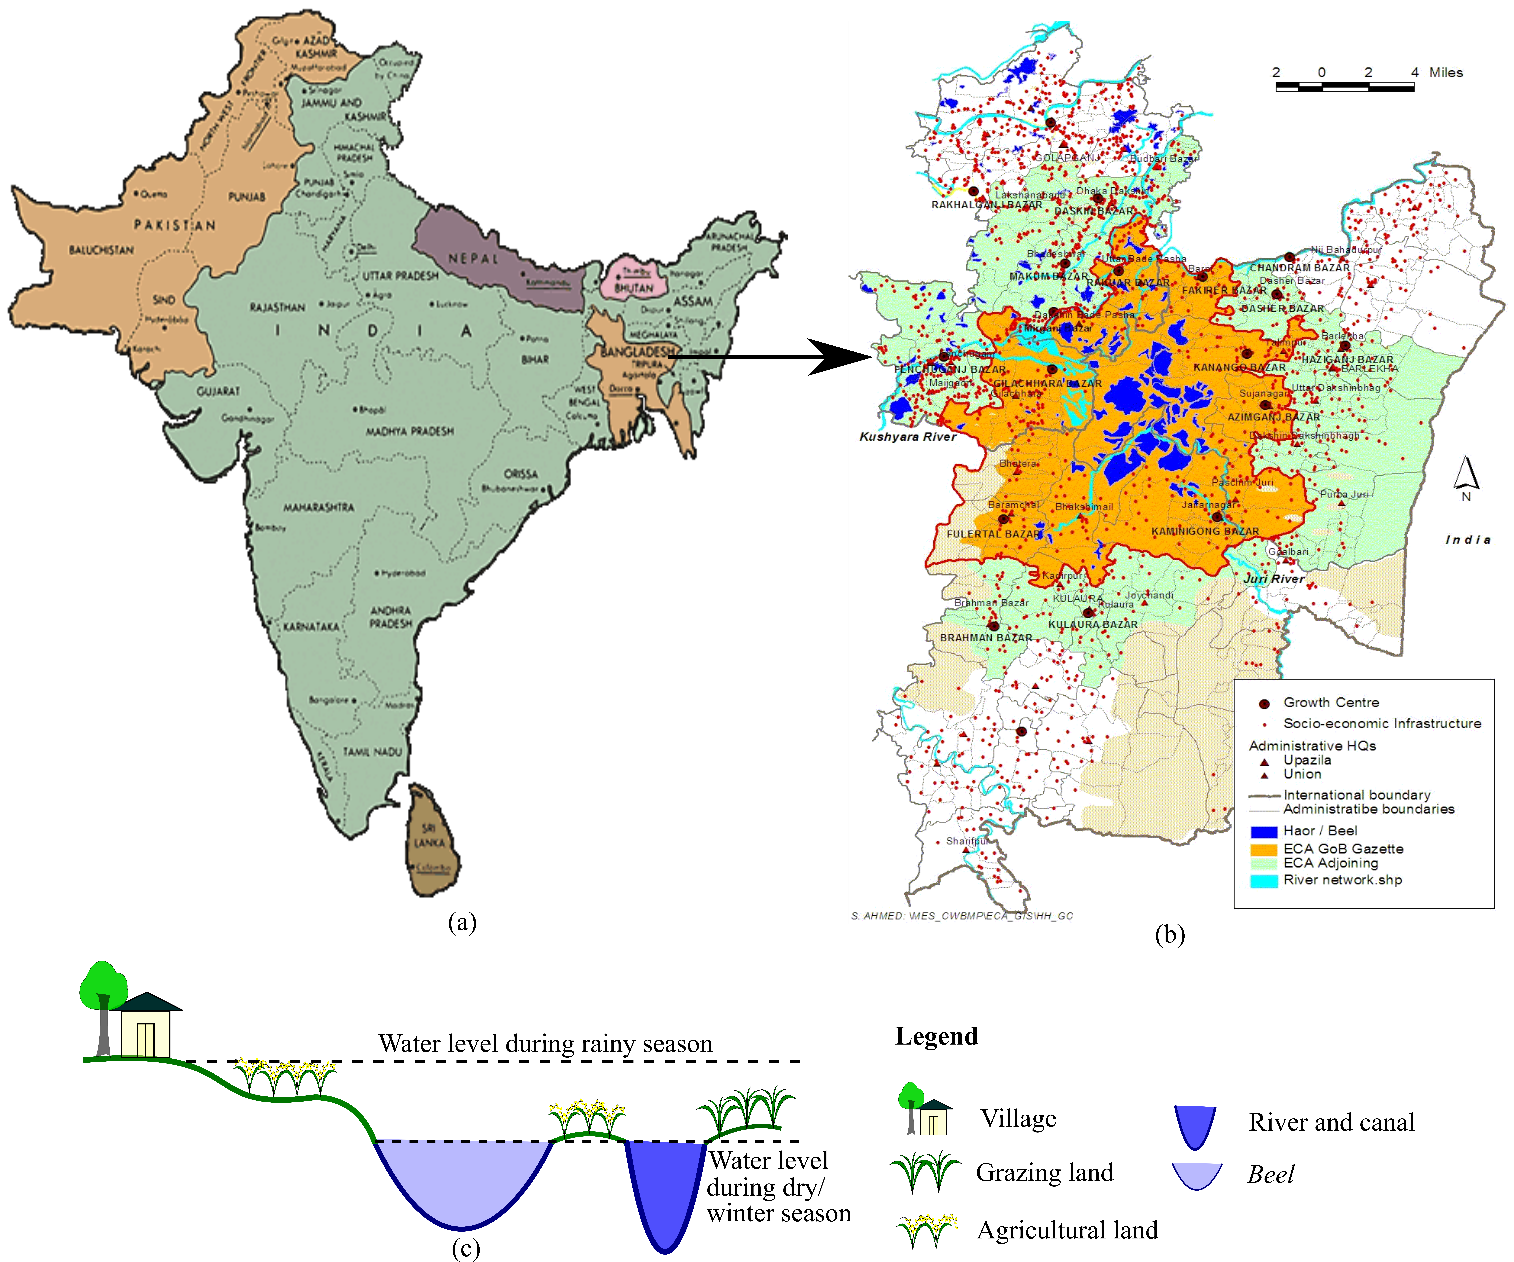


Supplementary material 1. Hakaluki *haor*: location, land feature and fisheries resource access categories based on seasonality and group identity. ((a) Location of Bangladesh and Hakaluki *haor* in South Asia; (b) Hakaluki *haor*; (c) Land features and land use practices of Hakaluki *haor* based on seasonality. (Map source: Department of Environment, the Government of Bangladesh).
